# Supplementary material for: Creating high quality Ca:TiO2-B (CaTi5O11) and TiO2-B epitaxial thin films by pulsed laser deposition
Source: Royal Society of Chemistry journal article supplement (doi:10.1039/c5cc01878a), 2015-01-01
Supplement: c5cc01878a1.pdf [file c5cc01878a1.pdf]

## Electronic Supplementary Information

### Creating High Quality Ca:TiO<sub>2</sub>-B (CaTi<sub>5</sub>O<sub>11</sub>) and TiO<sub>2</sub>-B Epitaxial Thin Films by Pulsed Laser Deposition

Kui Zhang, Xianfeng Du, Michael B. Katz, Baihai Li, Sung Joo Kim, Kaixin Song, George W. Graham, and Xiaoqing Pan\*

Department of Materials Science and Engineering  
University of Michigan, Ann Arbor, MI 48109, USA

\* Corresponding author, E-mail: panx@umich.edu

**Table S1.** Lattice structures of the phases and substrates involved in this study.

| Phase                          | Crystal system | Lattice parameters                                                                       |
|--------------------------------|----------------|------------------------------------------------------------------------------------------|
| Ca:TiO <sub>2</sub> -B         | orthorhombic   | $a=12.1702 \text{ \AA}, b=3.8013 \text{ \AA}, c=17.9841 \text{ \AA}$                     |
| TiO <sub>2</sub> -B            | monoclinic     | $a=12.1787 \text{ \AA}, b=3.7412 \text{ \AA}, c=6.5249 \text{ \AA}, \beta=107.054^\circ$ |
| TiO <sub>2</sub> -anatase      | tetragonal     | $a=b=3.7820 \text{ \AA}, c=9.5150 \text{ \AA}$                                           |
| TiO <sub>2</sub> -rutile       | tetragonal     | $a=b=4.5900 \text{ \AA}, c=2.9600 \text{ \AA}$                                           |
| CaTiO <sub>3</sub>             | pseudocubic    | $a=3.8917 \text{ \AA}$                                                                   |
| SrTiO <sub>3</sub>             | cubic          | $a=3.9051 \text{ \AA}$                                                                   |
| LSAT <sup>a</sup>              | cubic          | $a=3.8680 \text{ \AA}$                                                                   |
| LaAlO <sub>3</sub>             | pseudocubic    | $a=3.7913 \text{ \AA}$                                                                   |
| YSZ <sup>b</sup>               | cubic          | $a=5.1420 \text{ \AA}$                                                                   |
| MgO                            | cubic          | $a=4.2130 \text{ \AA}$                                                                   |
| Al <sub>2</sub> O <sub>3</sub> | hexagonal      | $a=4.7580 \text{ \AA}, c=12.9910 \text{ \AA}$                                            |

<sup>a</sup> (LaAlO<sub>3</sub>)<sub>0.3</sub>(Sr<sub>2</sub>AlTaO<sub>6</sub>)<sub>0.7</sub>; <sup>b</sup> yttria-stabilized zirconia

**Table S2.** In-plane mismatch (calculated on a diagonal basis) between difference phases and the substrate surfaces. The preferred phase eventually adopted by the film deposited from a (80% TiO<sub>2</sub> + 20% CaO) target on each specific substrate is set in bold.

| Substrate surface                               | Ca:TiO <sub>2</sub> -B<br>(001) | TiO <sub>2</sub> -anatase<br>(001) | TiO <sub>2</sub> -rutile<br>(001) | CaTiO <sub>3</sub><br>(001) | TiO <sub>2</sub> -B<br>(001) |
|-------------------------------------------------|---------------------------------|------------------------------------|-----------------------------------|-----------------------------|------------------------------|
| SrTiO <sub>3</sub> (001)                        | <b>3.25%</b>                    | -3.15%                             | 17.5%                             | -0.343%                     | 3.17% <sup>a</sup>           |
| LSAT (001)                                      | <b>4.24%</b>                    | <b>-2.22%</b>                      | 18.7%                             | 0.613%                      | 4.16% <sup>a</sup>           |
| LaAlO <sub>3</sub> (001)                        | <b>6.35%</b>                    | <b>-0.245%</b>                     | 21.1%                             | 2.65%                       | 6.27% <sup>a</sup>           |
| YSZ (100)                                       | 14.7%                           | 10.3%                              | <b>-10.7%</b>                     | 13.5%                       | 13.9% <sup>a</sup>           |
| MgO (100)                                       | -4.30%                          | -10.2%                             | 8.95%                             | <b>-7.63%</b>               | -4.37% <sup>a</sup>          |
| $\alpha$ -Al <sub>2</sub> O <sub>3</sub> (0001) | -22.6%                          | -11.1%                             | <b>7.95%</b>                      | -8.48%                      | -22.6% <sup>a</sup>          |
| Ca:TiO <sub>2</sub> -B (001)                    | 0                               | -6.20%                             | 13.8%                             | -3.48%                      | <b>-0.075%</b>               |

<sup>a</sup> For comparison only. TiO<sub>2</sub>-B does not grow directly on these substrates in this study.

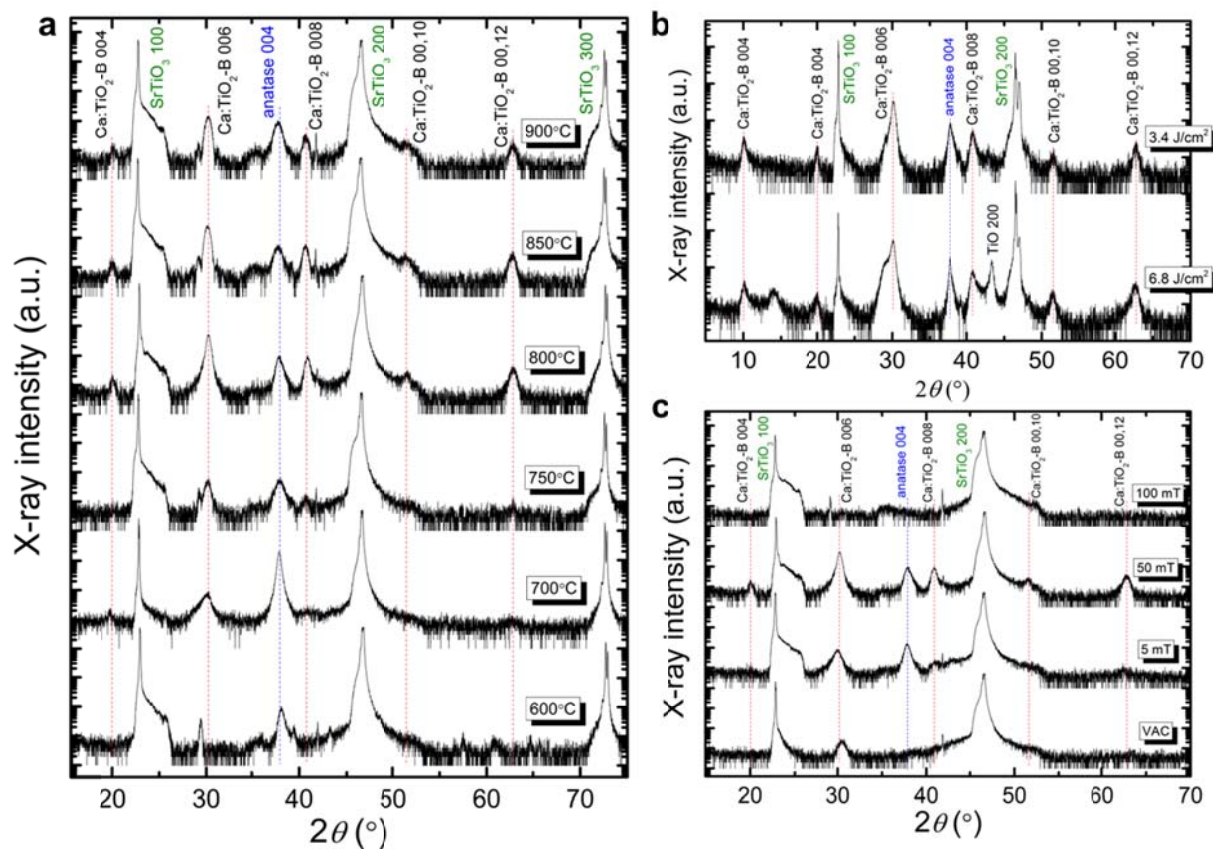

**Figure S1.** XRD patterns of the films deposited from a 10% CaO target on (001) SrTiO<sub>3</sub> substrates under different conditions: a) growth temperatures from 600 to 900 °C; b) laser fluence from 3.4 to 6.8 J cm<sup>-2</sup>; c) O<sub>2</sub> partial pressure from vacuum to 100 mTorr. Substrates peaks are labeled in green, anatase peaks in blue. Vertical dashed lines are drawn to mark peak positions for comparison.

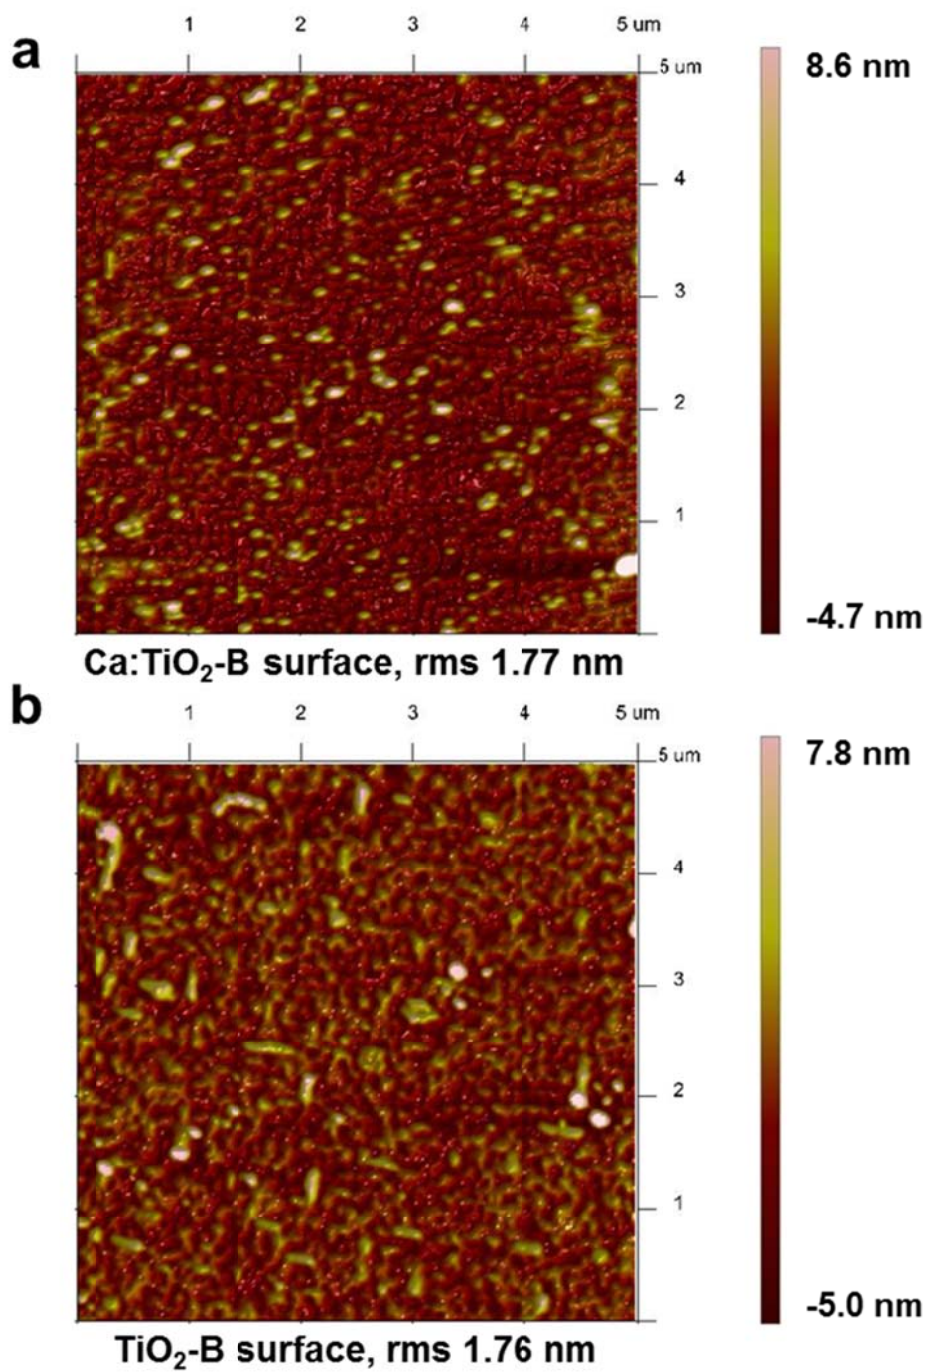

**Figure S2.** AFM images (tapping mode) showing the surfaces of a) a (001) Ca:TiO<sub>2</sub>-B film and b) a (001) TiO<sub>2</sub>-B film, respectively. Scan area is 5  $\mu\text{m} \times 5 \mu\text{m}$  for both.
